# Supplementary material for: Long life and high-rate Berlin green FeFe(CN)6 cathode material for a non-aqueous potassium-ion battery
Source: Royal Society of Chemistry journal article supplement (doi:10.1039/c7ta00484b), 2017-01-01
Supplement: c7ta00484b1.pdf [file c7ta00484b1.pdf]

## **Long Life and High-Rate Berlin Green $\text{FeFe}(\text{CN})_6$ Cathode**

### **Material for Nonaqueous Potassium-ion Battery**

Zulipiya Shadike<sup>a</sup>, Ding-Ren Shi<sup>a</sup>, Tian-Wang<sup>a</sup>, Ming-Hui Cao<sup>a</sup>, Shi-Feng Yang<sup>b</sup>

Jian Chen<sup>\*b</sup> Zheng-Wen Fu<sup>\*a</sup>

<sup>a</sup>*Shanghai Key Laboratory of Molecular Catalysts and Innovative Materials, Department of Chemistry & Laser  
Chemistry Institute, Fudan University Shanghai, 200433, P.R. China.*

<sup>b</sup>*Laboratory of Advanced Rechargeable Batteries, Dalian Institute of Chemical Physics, Chinese Academy of Sciences,  
Zhongshan Road 457#, Dalian 116023, PR China.*

*\*E-mail: zwf@fudan.edu.cn; chenjian@dicp.ac.cn*

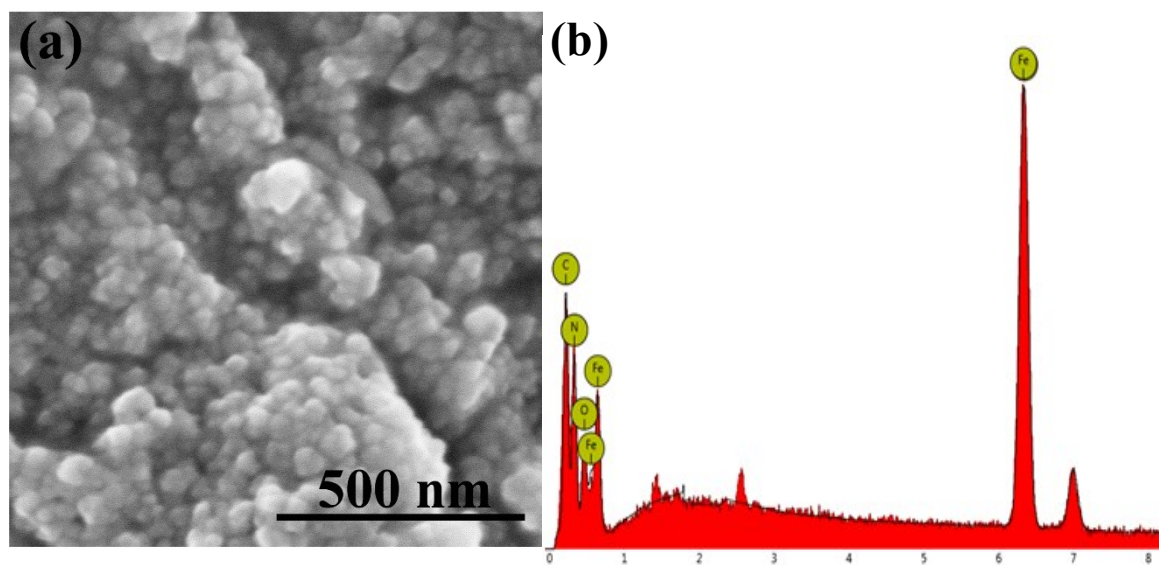

Figure S1 (a) SEM image and (b) EDS analysis of as-prepared FeHCF.

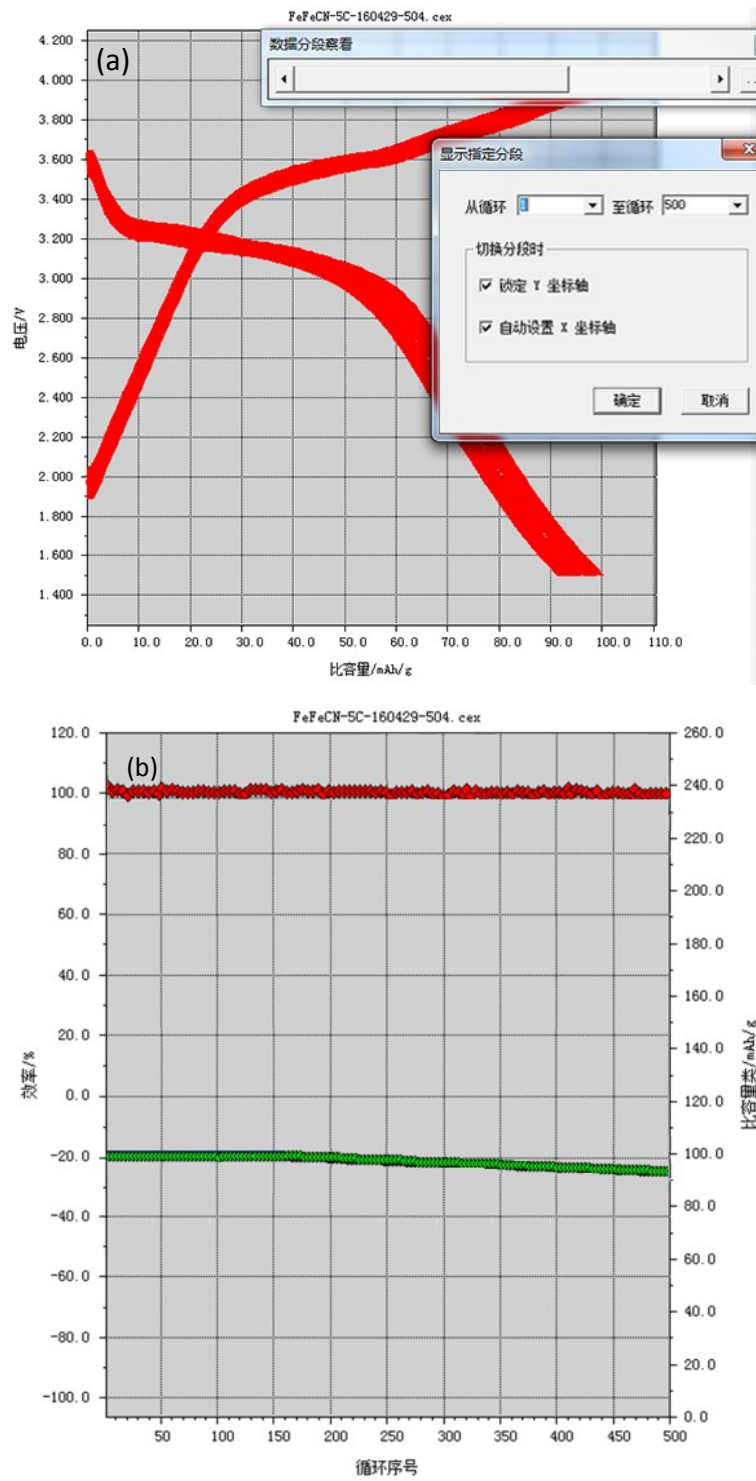

Figure S2 (a) Charge/discharge curves and (b) cyclic performance of FeHCF electrode at a current rate of 5C.

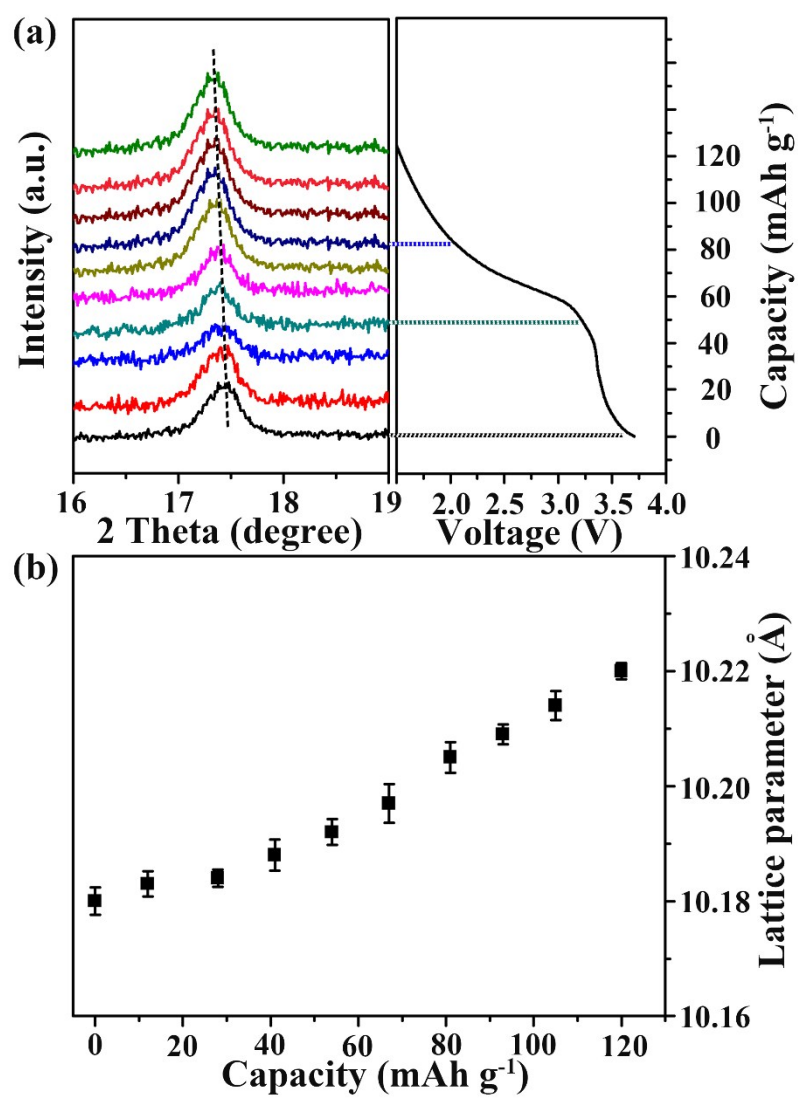

Figure S3. (a) The ex-situ XRD patterns of (200) diffraction peak and (b) calculated lattice parameter at the different discharged states.

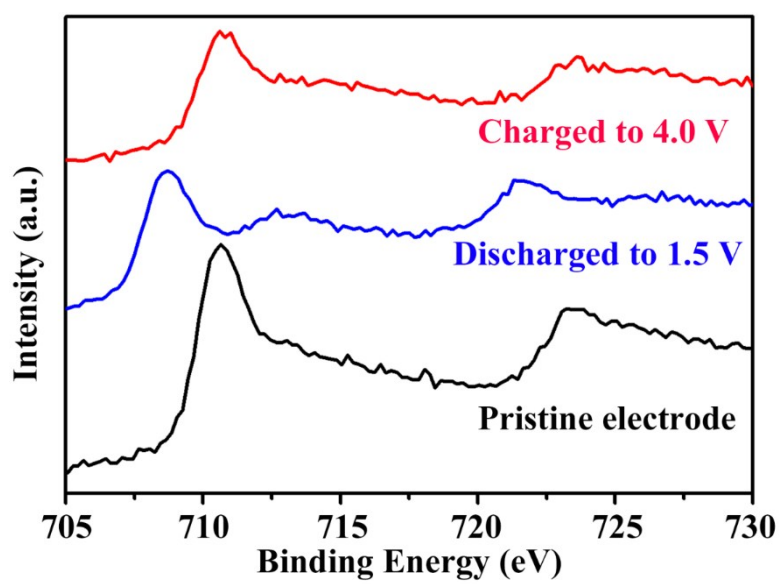

Figure S4. Fe 2p XPS spectra of pristine FeHCF electrode and after the electrode discharged to 1.5 V, charged to 4.0 V.

Table S1. Valence state distribution of Fe in the FeHCF electrode at the different states obtained from Mössbauer spectra.

| sample              | QS (mm s <sup>-1</sup> ) | IS (mm s <sup>-1</sup> ) | Linewidth (mm s <sup>-1</sup> ) | Fraction (%)            |
|---------------------|--------------------------|--------------------------|---------------------------------|-------------------------|
| Pristine            | 0                        | -0.153                   | 0.349                           | Fe <sup>III</sup> :100  |
|                     | 0.537                    | 0.382                    | 0.395                           |                         |
| Discharge<br>d      | 1.295                    | 1.039                    | 0.400                           | Fe <sup>II</sup> :69.1  |
|                     | 0.654                    | 0.337                    | 0.396                           |                         |
| To 1.5 V            | 0                        | -0.128                   | 0.270                           | Fe <sup>III</sup> :30.9 |
| Charged to<br>4.0 V | 0                        | -0.138                   | 0.249                           | Fe <sup>III</sup> :95.2 |
|                     | 0.554                    | 0.355                    | 0.473                           |                         |
|                     | 1.365                    | 1.082                    | 0.322                           | Fe <sup>II</sup> :4.8   |
